# Supplementary material for: Observed hydrolysis of fluorine substituted bis(β-diketonato)-dichlorotitanium(iv) complexes
Source: Royal Society of Chemistry journal article supplement (doi:10.1039/c4dt02614d), 2015-01-01
Supplement: c4dt02614d1.pdf [file c4dt02614d1.pdf]

## Observed hydrolysis of fluorine substituted bis( $\beta$ -diketonato)-dichlorotitanium(IV) complexes

A. Kuhn<sup>a</sup> and J. Conradie<sup>a,\*</sup>

<sup>a</sup> Department of Chemistry, University of the Free State, 9300 Bloemfontein, Republic of South Africa.

\* Corresponding author, email: conradj@ufs.ac.za

### Supplementary Information

Table S1. <sup>1</sup>H NMR chemical shift data of the methine protons (CH) for the chelated and uncoordinated  $\beta$ -diketonates in Ti( $\beta$ -diketonato)<sub>2</sub>Cl<sub>2</sub> and H $\beta$ -diketone respectively.

| Ti( $\beta$ -diketonato) <sub>2</sub> Cl <sub>2</sub>        |        |                            |                |                                                    | Free $\beta$ -diketone                  |
|--------------------------------------------------------------|--------|----------------------------|----------------|----------------------------------------------------|-----------------------------------------|
| Compound                                                     | Colour | <sup>1</sup> H / ppm<br>CH | $\Delta$ (A-B) | $\Delta$ (A-H $\beta$ )<br>$\Delta$ (B-H $\beta$ ) | <sup>1</sup> H / ppm<br>CH (H $\beta$ ) |
| <b>(a) CF<sub>3</sub>-<math>\beta</math>-diketonates:</b>    |        |                            |                |                                                    |                                         |
| Ti(tfaa) <sub>2</sub> Cl <sub>2</sub>                        | Yellow | A = 6.40<br>B = 6.24       | 0.16           | 0.40<br>0.24                                       | 6.00                                    |
| Ti(hfaa) <sub>2</sub> Cl <sub>2</sub>                        | Yellow | A = 6.80<br>B = 6.70       | 0.10           | 0.40<br>0.30                                       | 6.40                                    |
| Ti(tfth) <sub>2</sub> Cl <sub>2</sub>                        | Red    | A = 6.82<br>B = 6.63       | 0.19           | 0.37<br>0.18                                       | 6.45                                    |
| Ti(tffu) <sub>2</sub> Cl <sub>2</sub>                        | Red    | A = 6.93<br>B = 6.74       | 0.19           | 0.44<br>0.25                                       | 6.49                                    |
| <b>(b) Non-CF<sub>3</sub>-<math>\beta</math>-diketonates</b> |        |                            |                |                                                    |                                         |
| Ti(acac) <sub>2</sub> Cl <sub>2</sub>                        | Orange | <i>cis</i> 6.00            | -              | 0.50                                               | 5.50                                    |
| Ti(ba) <sub>2</sub> Cl <sub>2</sub>                          | Red    | <i>cis</i> 6.67            | -              | 0.48                                               | 6.19                                    |
| Ti(dbm) <sub>2</sub> Cl <sub>2</sub>                         | Red    | <i>cis</i> 7.35            | -              | 0.50                                               | 6.85                                    |

Table S2. <sup>1</sup>H and <sup>19</sup>F NMR chemical shifts of the methine proton (CH) and CF<sub>3</sub> of *cis*-Ti( $\beta$ -diketonato)<sub>2</sub>Cl<sub>2</sub> complexes, at T = -60 °C. Values shown in blue are the relative contributions of the indicated signals (%) of the three *cis*-isomers.

| Compound                                              | <sup>1</sup> H / CH ppm                                  | No of Peaks | <sup>19</sup> F / CF <sub>3</sub> ppm                                         | No of Peaks |
|-------------------------------------------------------|----------------------------------------------------------|-------------|-------------------------------------------------------------------------------|-------------|
| <b>(a) Symmetric-<math>\beta</math>-diketonates</b>   |                                                          |             |                                                                               |             |
| Ti(hfaa) <sub>2</sub> Cl <sub>2</sub>                 | 6.85<br>(100)                                            | 1           | -73.39, -73.49<br>(50.0), (50.0)                                              | 2           |
| <b>(b) Unsymmetric-<math>\beta</math>-diketonates</b> |                                                          |             |                                                                               |             |
| Ti(tffu) <sub>2</sub> Cl <sub>2</sub>                 | --                                                       | --          | -73.48, -73.57, -73.62, -74.55<br>(15.3), (11.5), (22.7), (50.5)              | 4           |
| Ti(tfth) <sub>2</sub> Cl <sub>2</sub>                 | --                                                       | --          | -73.31, -73.52, -74.39, -74.43<br>(14.3), (57.1), (14.3), (14.3)              | 4           |
| Ti(tfaa) <sub>2</sub> Cl <sub>2</sub>                 | 6.52, 6.51, 6.50, 6.49<br>(26.3), (26.3), (23.7), (23.7) | 4           | -73.66, -73.72, -74.80, -74.83<br>(24.3), (30.8), (24.3), (20.6)              | 4           |
| Ti(ba) <sub>2</sub> Cl <sub>2</sub>                   | 6.77, 6.76<br>(27.9), (72.1)                             | 2*          | <sup>1</sup> H / CH <sub>3</sub> : 2.48, 2.47, 2.37<br>(17.4), (27.9), (54.7) | 3*          |

\* Temperature lowering below -60 °C, needed for complete peak slitting, is limited by the freezing point of CDCl<sub>3</sub> (-63.5 °C).

Table S3. Crystal data and structure refinement data for dimeric  $\{\text{Ti}(\text{hfaa})_2\text{Cl}\}_2(\mu\text{-O})$  and tetrameric,  $[\text{Ti}(\text{hfaa})_2(\mu\text{-O})]_4$  structures.

|                                                       | $\{\text{Ti}(\text{hfaa})_2\text{Cl}\}_2(\mu\text{-O})$                                              | $[\text{Ti}(\text{hfaa})_2(\mu\text{-O})]_4$                                                                  |
|-------------------------------------------------------|------------------------------------------------------------------------------------------------------|---------------------------------------------------------------------------------------------------------------|
| <b>Formula</b>                                        | $\text{Ti}_2\text{O}_9\text{C}_{20}\text{H}_4\text{Cl}_2\text{F}_{24}$                               | $\text{Ti}_4\text{O}_{20}\text{C}_{40}\text{H}_8\text{F}_{48}$                                                |
| <b>Formula weight</b>                                 | 1010.93                                                                                              | 1912.06                                                                                                       |
| <b>Crystal colour/habit</b>                           | Yellow, cuboid                                                                                       | Yellow, cuboid                                                                                                |
| <b>Crystal system</b>                                 | Tetragonal                                                                                           | Monoclinic                                                                                                    |
| <b>Space group</b>                                    | $I4_1/a$                                                                                             | $P2_1/n$                                                                                                      |
| <b>Unit cell dimension</b><br>/Å<br>/°                | a = 23.1255(4)<br>b = 23.1255(4)<br>c = 12.3948(5)<br>$\alpha = 90$<br>$\beta = 90$<br>$\gamma = 90$ | a = 13.7394(4)<br>b = 16.4156(4)<br>c = 28.3400(7)<br>$\alpha = 90$<br>$\beta = 99.7990(10)$<br>$\gamma = 90$ |
| <b>Volume / Å<sup>3</sup></b>                         | 6628.6(3)                                                                                            |                                                                                                               |
| <b>Z</b>                                              | 8                                                                                                    | 6298.6(3)                                                                                                     |
| <b>Density<sub>calc</sub> / Mg m<sup>-3</sup></b>     | 2.026                                                                                                | 4                                                                                                             |
| <b>Temperature / °C</b>                               | -173(2)                                                                                              | 2.016                                                                                                         |
| <b>Wavelength / Å</b>                                 | 0.71073                                                                                              | -173(2)                                                                                                       |
| <b>Absorption coefficient / mm<sup>-1</sup></b>       | 0.825                                                                                                | 0.71073                                                                                                       |
| <b>F(000)</b>                                         | 3920                                                                                                 | 0.700                                                                                                         |
| <b>Crystal size / mm<sup>3</sup></b>                  | 0.29 x 0.20 x 0.18                                                                                   | 0.40 x 0.35 x 0.29                                                                                            |
| <b>Theta range for data collection / °</b>            | 2.49 to 28.27                                                                                        | 1.44 to 28.35                                                                                                 |
| <b>Index ranges</b>                                   | -30 ≤ h ≤ 29,<br>-29 ≤ k ≤ 30,<br>-16 ≤ l ≤ 15                                                       | -17 ≤ h ≤ 18,<br>-21 ≤ k ≤ 15,<br>-35 ≤ l ≤ 37                                                                |
| <b>Reflections collected</b>                          | 34 701                                                                                               | 55 209                                                                                                        |
| <b>Independent reflections</b>                        | 4105[R(int) = 0.0399]                                                                                | 15 535[R(int) = 0.0301]                                                                                       |
| <b>Completeness to theta = 28.35 / %</b>              | 100.0                                                                                                | 98.7                                                                                                          |
| <b>Absorption correction</b>                          | Semi-empirical from equivalents                                                                      | Semi-empirical from equivalents                                                                               |
| <b>Max. and min. transmission</b>                     | 0.8657 and 0.7958                                                                                    | 0.8227 and 0.7670                                                                                             |
| <b>Refinement method</b>                              | Full-matrix least-squares on F <sup>2</sup>                                                          | Full-matrix least-squares on F <sup>2</sup>                                                                   |
| <b>Data/restraints/parameters</b>                     | 4105 / 0 / 259                                                                                       | 15 535 / 0 / 1007                                                                                             |
| <b>Goodness-of-fit on F<sup>2</sup></b>               | 1.017                                                                                                | 1.030                                                                                                         |
| <b>Final R indices [I &gt; 2σ(I)]</b>                 | R <sub>1</sub> = 0.0357,<br>wR <sub>2</sub> = 0.0812                                                 | R <sub>1</sub> = 0.0465,<br>wR <sub>2</sub> = 0.1189                                                          |
| <b>R indices (all data)</b>                           | R <sub>1</sub> = 0.0454<br>wR <sub>2</sub> = 0.0871                                                  | R <sub>1</sub> = 0.0608<br>wR <sub>2</sub> = 0.1333                                                           |
| <b>Largest diff. peak and hole / e.Å<sup>-3</sup></b> | 0.524 and -0.377                                                                                     | 1.953 and -1.241                                                                                              |

Table S4. Hydrogen bonds for  $\{\text{Ti}(\text{hfaa})_2\text{Cl}\}_2(\mu\text{-O})$  and  $[\text{Ti}(\text{hfaa})_2(\mu\text{-O})]_4$  (Å and °).

| D-H...A               | d(D-H) | d(H...A) | d(D...A) | <(DHA) |
|-----------------------|--------|----------|----------|--------|
| Dimer                 |        |          |          |        |
| C(8)-H(8)...Cl#1      | 0.95   | 2.89     | 3.840(2) | 176.2  |
| Tetramer              |        |          |          |        |
| C(8)-H(8)...F(42)#2   | 0.95   | 2.42     | 3.367(2) | 172.0  |
| C(23)-H(23)...F(38)#3 | 0.95   | 2.49     | 3.195(3) | 130.8  |
| C(33)-H(33)...F(3)#4  | 0.95   | 2.34     | 3.281(3) | 168.9  |

Symmetry transformations used to generate equivalent atoms:

#1  $-y+3/4, x-3/4, z+1/4$  #2  $-x, -y+1, -z+1$  #3  $-x, y+1/2, -z+3/2$  #4  $x-1, y, z$

### Crystallography

The initial unit cell and data collection were achieved by the Apex2 software<sup>1</sup> utilizing COSMO<sup>2</sup> for optimum collection of more than a hemisphere of reciprocal space. A total of 1143 and 1335 frames were collected at exposure times of 35 and 8 s.frame<sup>-1</sup> for  $\{\text{Ti}(\text{hfaa})_2\text{Cl}\}_2(\mu\text{-O})$  and  $[\text{Ti}(\text{hfaa})_2(\mu\text{-O})]_4$  respectively. Both collections were done with a 0.5° scan width in  $\varphi$  and  $\omega$ . The frames were integrated using a narrow-frame integration algorithm and reduced with the SAINT-Plus<sup>3</sup> and XPREP<sup>3</sup> software packages respectively. Analysis of the data sets showed no significant decay during the data collection. Data were corrected for absorption effects using the multi-scan technique SADABS<sup>4</sup>. Both structures were solved by the direct methods package SIR97<sup>5</sup> and refined using the WinGX software package<sup>6</sup> incorporating SHELXL.<sup>7</sup>

The structure of  $[\text{Ti}(\text{hfaa})_2(\mu\text{-O})]_4$  showed large thermal ellipsoids on some of the peripheral  $\text{CF}_3$  groups, especially for C38, F43, F44 and F45. The fluorides for this group was subsequently refined as disordered over two positions with their occupancies (50.26% and 49.74%) linked to a free variable to add to unity. Anisotropic displacement parameters of the disordered fluoride atoms had to be restrained (SIMU and DELU) with the default parameters of these adjusted to avoid serious alerts from the checkCIF routines. C–F bond distances, varying from 1.242 Å to 1.334 Å, were not restrained as these remained stable and within bounds during refinement. Four discrepant reflections were also removed during the final refinement cycles as these showed up as serious alerts. The final refinement of  $[\text{Ti}(\text{hfaa})_2(\mu\text{-O})]_4$  showed only minor alerts, of note are the thermal ellipsoids for a few fluoride atoms. As these are signs of minor disorders, they were not further treated by refinement as it is believed that addressing these will not add to the significance of the paper. A similar approach was taken during the refinement of  $\{\text{Ti}(\text{hfaa})_2\text{Cl}\}_2(\mu\text{-O})$ , which also showed signs of minor disorder in the  $\text{CF}_3$  regions.

Both data sets were evaluated online with the latest checkCIF routines, and showed no serious errors. The final refinement cycles yielded electron density maps with the highest peak value of 0.52 e.Å<sup>-3</sup> at 1.15 Å from F2 and the deepest hole -0.38 e.Å<sup>-3</sup> at 0.81 Å from F3 for  $\{\text{Ti}(\text{hfaa})_2\text{Cl}\}_2(\mu\text{-O})$ , and the highest peak value of 0.86 e.Å<sup>-3</sup> at 0.69 Å from F45B and the deepest hole -0.71 e.Å<sup>-3</sup> at 0.13 Å from F43B for  $[\text{Ti}(\text{hfaa})_2(\mu\text{-O})]_4$ .

For both structures the aromatic H atoms were placed in geometrically idealized positions (C–H = 0.95 Å) and constrained to ride on their parent atoms with  $U_{\text{iso}}(\text{H}) = 1.2U_{\text{eq}}(\text{C})$ . Non-hydrogen atoms were refined with anisotropic displacement parameters. Atomic scattering factors were taken from the International Tables for Crystallography Volume C.<sup>8</sup> The molecular plot was drawn using the DIAMOND program<sup>9</sup> with a 30% thermal envelope probability for non-hydrogen atoms. Hydrogen atoms were drawn as arbitrary sized spheres with radius of 0.135 Å.

Table S5. Optimized geometry, relative energy of the 10 possible isomers of  $\{\text{Ti}(\text{tfaa})_2\text{Cl}\}_2(\mu\text{-O})$ . Color code used for atoms shown below:

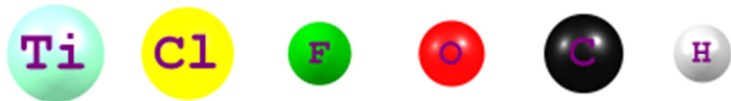

| Isomer number <sup>a</sup> | Optimized geometry | E <sub>rel</sub> (eV) |
|----------------------------|--------------------|-----------------------|
| 1111                       |                    | 0.060                 |
| 1112 (enantiomer 2111)     |                    | 0.001                 |
| 1212 (enantiomer 2121)     |                    | 0.039                 |
| 1122 (enantiomer 2211)     |                    | 0.002                 |
| 1221                       |                    | 0.000                 |
| 1222 (enantiomer 2221)     |                    | 0.025                 |

|                        |                                                                                    |       |
|------------------------|------------------------------------------------------------------------------------|-------|
| 2222                   | 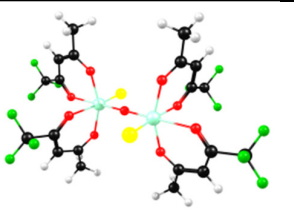  | 0.026 |
| 1121 (enantiomer 1211) |   | 0.012 |
| 2212 (enantiomer 2122) |   | 0.026 |
| 2112                   |  | 0.017 |

a The isomers are referred to by 4 numbers indicating the groups that occupy the 4 *trans* positions: 1 = CF<sub>3</sub> and 2 = R (CH<sub>3</sub>, C<sub>4</sub>H<sub>3</sub>S and C<sub>4</sub>H<sub>3</sub>O). For the higher symmetry isomers 1111 and 2222, 2 ring H and 2 CF<sub>3</sub> NMR signals are expected while for the other isomers 4 ring H and 4 CF<sub>3</sub> NMR signals are expected.

### Optimized Cartesian coordinates (Å)

DFT calculations: Geometries were optimized using the ADF (Amsterdam Density Functional) 2012 programme<sup>10</sup> with the OLYP (Handy-Cohen and Lee-Yang-Parr) GGA (Generalized Gradient Approximation) functional, the TZP (Triple  $\zeta$  polarized) basis set, no symmetry constraint ( $C_1$ ) in chloroform ( $\epsilon_0 = 4.8$ ) as solvent.<sup>11,12,13,14,15</sup>

#### 1 Ti(acac)<sub>2</sub>Cl<sub>2</sub>

|    |              |              |              |
|----|--------------|--------------|--------------|
| C  | 0.544831000  | 4.197759000  | -0.893071000 |
| C  | 0.794263000  | 2.726202000  | -1.066725000 |
| C  | 1.668169000  | 2.240271000  | -2.040360000 |
| C  | 1.945855000  | 0.869695000  | -2.201530000 |
| C  | 2.948994000  | 0.400866000  | -3.221233000 |
| C  | -0.555535000 | -4.203471000 | -0.875290000 |
| C  | -0.799501000 | -2.731914000 | -1.057440000 |
| C  | -1.672008000 | -2.249409000 | -2.034697000 |
| C  | -1.947232000 | -0.879580000 | -2.203016000 |
| C  | -2.940519000 | -0.412600000 | -3.233093000 |
| Cl | 1.698676000  | -0.250972000 | 1.575661000  |
| Cl | -1.710454000 | 0.256199000  | 1.571268000  |
| H  | 0.513362000  | -4.411265000 | -0.998704000 |
| H  | 0.802750000  | 4.491354000  | 0.130526000  |
| H  | 1.119080000  | 4.797812000  | -1.599886000 |
| H  | 2.176614000  | 2.951188000  | -2.680981000 |
| H  | 2.488357000  | -0.354046000 | -3.867058000 |
| H  | 3.334133000  | 1.219890000  | -3.829880000 |
| H  | 3.782890000  | -0.086563000 | -2.703027000 |
| H  | -0.524077000 | 4.401104000  | -1.023788000 |
| H  | -0.820555000 | -4.490815000 | 0.148329000  |
| H  | -1.128035000 | -4.805349000 | -1.581990000 |
| H  | -2.180496000 | -2.962720000 | -2.672593000 |
| H  | -2.452150000 | 0.291926000  | -3.915219000 |
| H  | -3.363833000 | -1.239493000 | -3.804567000 |
| H  | -3.747470000 | 0.133967000  | -2.732314000 |
| O  | 0.150372000  | 1.953615000  | -0.249279000 |
| O  | 1.388318000  | -0.049642000 | -1.501841000 |
| O  | -0.154428000 | -1.957120000 | -0.243749000 |
| O  | -1.391587000 | 0.041965000  | -1.504124000 |
| Ti | -0.004417000 | -0.000144000 | -0.003649000 |

#### 2 Ti(hfaa)<sub>2</sub>Cl<sub>2</sub>

|   |             |              |              |
|---|-------------|--------------|--------------|
| C | 0.138525000 | 3.640585000  | -2.413468000 |
| C | 0.360291000 | 2.803819000  | -1.114339000 |
| C | 0.703775000 | -3.377897000 | 2.694342000  |
| C | 0.842496000 | 3.406101000  | 0.044064000  |
| C | 1.081575000 | -2.353767000 | 1.578233000  |
| C | 1.084863000 | 2.630473000  | 1.192129000  |
| C | 1.648564000 | 3.304836000  | 2.486176000  |

|    |              |              |              |
|----|--------------|--------------|--------------|
| C  | 2.280681000  | -2.474200000 | 0.881251000  |
| C  | 2.618199000  | -1.532813000 | -0.107331000 |
| C  | 3.967326000  | -1.669717000 | -0.886599000 |
| Cl | -0.815895000 | -1.331170000 | -1.630268000 |
| Cl | -2.048512000 | 0.569148000  | 0.929339000  |
| F  | 0.419200000  | 4.955297000  | -2.244281000 |
| F  | 0.465440000  | -2.730386000 | 3.863927000  |
| F  | 0.751296000  | 3.176253000  | 3.499126000  |
| F  | 0.929290000  | 3.166942000  | -3.412260000 |
| F  | 1.675166000  | -4.296798000 | 2.912796000  |
| F  | 1.907518000  | 4.624828000  | 2.322428000  |
| F  | 2.799880000  | 2.694254000  | 2.868935000  |
| F  | 3.711718000  | -1.963050000 | -2.190779000 |
| F  | 4.655721000  | -0.501256000 | -0.849472000 |
| F  | 4.765469000  | -2.644882000 | -0.388694000 |
| F  | -0.430332000 | -4.042380000 | 2.347909000  |
| F  | -1.153369000 | 3.538481000  | -2.820389000 |
| H  | 1.055527000  | 4.465716000  | 0.053006000  |
| H  | 2.961647000  | -3.280602000 | 1.113947000  |
| O  | 0.060951000  | 1.569063000  | -1.258944000 |
| O  | 0.188969000  | -1.455785000 | 1.401345000  |
| O  | 0.885428000  | 1.387377000  | 1.311698000  |
| O  | 1.917848000  | -0.544450000 | -0.470692000 |
| Ti | -0.072904000 | 0.003222000  | 0.018813000  |

3 {Ti(acac)<sub>2</sub>Cl}<sub>2</sub>( $\mu$ -O)

|    |              |              |              |
|----|--------------|--------------|--------------|
| C  | 2.121892000  | 2.676422000  | 3.310180000  |
| C  | 2.158049000  | 2.248225000  | 1.865442000  |
| C  | 2.261296000  | -3.529372000 | 2.565229000  |
| C  | 2.340174000  | 2.854653000  | -0.516270000 |
| C  | 2.346902000  | 3.192960000  | 0.840704000  |
| C  | 2.532852000  | 3.903173000  | -1.580939000 |
| C  | 2.768226000  | -2.394598000 | 1.713025000  |
| C  | 4.129482000  | -2.113080000 | 1.616839000  |
| C  | 4.655076000  | -1.087795000 | 0.792726000  |
| C  | 6.149866000  | -0.899197000 | 0.687217000  |
| C  | -2.132441000 | -2.664760000 | -3.320976000 |
| C  | -2.166353000 | -2.242136000 | -1.874654000 |
| C  | -2.258848000 | 3.537222000  | -2.550775000 |
| C  | -2.345003000 | -2.858023000 | 0.504977000  |
| C  | -2.355149000 | -3.190655000 | -0.853377000 |
| C  | -2.536249000 | -3.910949000 | 1.565549000  |
| C  | -2.766366000 | 2.399850000  | -1.702327000 |
| C  | -4.127786000 | 2.119538000  | -1.605992000 |
| C  | -4.653609000 | 1.091546000  | -0.785315000 |
| C  | -6.148472000 | 0.902636000  | -0.681079000 |
| Cl | 1.983327000  | -1.207145000 | -2.157400000 |
| Cl | -1.975163000 | 1.197313000  | 2.161634000  |
| H  | 1.117992000  | 2.487290000  | 3.707685000  |
| H  | 1.543132000  | -3.140805000 | 3.295955000  |
| H  | 1.674379000  | 3.890641000  | -2.261565000 |
| H  | 1.721834000  | -4.244464000 | 1.933842000  |
| H  | 2.363573000  | 3.732804000  | 3.436658000  |
| H  | 2.489085000  | 4.232129000  | 1.113902000  |
| H  | 2.650487000  | 4.903064000  | -1.160711000 |
| H  | 2.819313000  | 2.065644000  | 3.892501000  |
| H  | 3.067556000  | -4.046838000 | 3.087280000  |
| H  | 3.417123000  | 3.654148000  | -2.178572000 |

|    |              |              |              |
|----|--------------|--------------|--------------|
| H  | 4.822532000  | -2.733175000 | 2.174344000  |
| H  | 6.405181000  | 0.130223000  | 0.960972000  |
| H  | 6.455566000  | -1.038532000 | -0.355814000 |
| H  | 6.705952000  | -1.592096000 | 1.320599000  |
| H  | -1.127889000 | -2.478705000 | -3.718437000 |
| H  | -1.544403000 | 3.149942000  | -3.285805000 |
| H  | -1.674654000 | -3.904376000 | 2.242334000  |
| H  | -1.715244000 | 4.247664000  | -1.917742000 |
| H  | -2.378732000 | -3.719606000 | -3.451533000 |
| H  | -2.499043000 | -4.228557000 | -1.130365000 |
| H  | -2.658952000 | -4.908506000 | 1.141155000  |
| H  | -2.827921000 | -2.048730000 | -3.899965000 |
| H  | -3.065101000 | 4.059645000  | -3.067840000 |
| H  | -3.417019000 | -3.661802000 | 2.168234000  |
| H  | -4.820691000 | 2.742272000  | -2.160760000 |
| H  | -6.403684000 | -0.125273000 | -0.960633000 |
| H  | -6.454456000 | 1.036191000  | 0.362617000  |
| H  | -6.704362000 | 1.598969000  | -1.310853000 |
| O  | 0.000824000  | -0.001705000 | -0.001409000 |
| O  | 1.849333000  | -1.731858000 | 1.083211000  |
| O  | 1.996155000  | 0.994816000  | 1.653719000  |
| O  | 2.168717000  | 1.652259000  | -0.950748000 |
| O  | 3.934269000  | -0.297540000 | 0.102726000  |
| O  | -1.847579000 | 1.733381000  | -1.076505000 |
| O  | -1.999649000 | -0.990135000 | -1.657958000 |
| O  | -2.168800000 | -1.658143000 | 0.944063000  |
| O  | -3.933050000 | 0.298774000  | -0.098061000 |
| Ti | 1.815187000  | -0.108995000 | -0.055252000 |
| Ti | -1.813784000 | 0.106048000  | 0.055414000  |

4 {Ti(hfaa)<sub>2</sub>Cl}<sub>2</sub>( $\mu$ -O)

|    |              |              |              |
|----|--------------|--------------|--------------|
| C  | 0.427394000  | 0.662792000  | -6.298197000 |
| C  | 0.704165000  | 0.154820000  | -4.840625000 |
| C  | 1.719599000  | -0.804774000 | -4.620550000 |
| C  | 1.978580000  | -1.278773000 | -3.343320000 |
| C  | 2.669864000  | 1.056193000  | 2.494382000  |
| C  | 2.919255000  | -1.328172000 | 2.121018000  |
| C  | 3.080223000  | -2.359123000 | -3.117295000 |
| C  | 3.313056000  | 2.428329000  | 2.895643000  |
| C  | 3.472846000  | -0.099178000 | 2.471068000  |
| C  | 3.813010000  | -2.609813000 | 2.080523000  |
| C  | -0.410417000 | -0.640051000 | 6.304371000  |
| C  | -0.694651000 | -0.141155000 | 4.845101000  |
| C  | -1.708641000 | 0.819653000  | 4.624567000  |
| C  | -1.976280000 | 1.282794000  | 3.345071000  |
| C  | -2.670012000 | -1.060478000 | -2.509734000 |
| C  | -2.924985000 | 1.319670000  | -2.115355000 |
| C  | -3.085818000 | 2.354603000  | 3.116372000  |
| C  | -3.309126000 | -2.429011000 | -2.929595000 |
| C  | -3.475741000 | 0.092929000  | -2.476886000 |
| C  | -3.821656000 | 2.598639000  | -2.058836000 |
| Cl | 1.303155000  | 2.242604000  | -1.689505000 |
| Cl | -1.309818000 | -2.246849000 | 1.701825000  |
| F  | 0.454013000  | 2.018778000  | -6.336974000 |
| F  | 0.827635000  | -0.232483000 | 6.697748000  |
| F  | 1.328554000  | 0.201344000  | -7.201162000 |
| F  | 2.528207000  | -3.488828000 | -2.599404000 |
| F  | 2.844550000  | 3.429001000  | 2.115512000  |



|    |              |              |              |
|----|--------------|--------------|--------------|
| F  | 2.988963000  | 2.714989000  | 4.188432000  |
| F  | 3.432726000  | -3.466042000 | 3.066479000  |
| F  | 3.672888000  | -3.248813000 | 0.892982000  |
| F  | 3.724347000  | -2.697669000 | -4.260918000 |
| F  | 4.009875000  | -1.907574000 | -2.234627000 |
| F  | 4.665799000  | 2.416285000  | 2.799663000  |
| F  | 5.128608000  | -2.331888000 | 2.253339000  |
| F  | -0.435989000 | -1.995691000 | 6.351534000  |
| F  | -0.808848000 | 0.258406000  | -6.700231000 |
| F  | -1.307312000 | -0.173783000 | 7.209264000  |
| F  | -2.545800000 | 3.480879000  | 2.578996000  |
| F  | -2.833557000 | -3.440198000 | -2.167877000 |
| F  | -2.989135000 | -2.692722000 | -4.228272000 |
| F  | -3.450847000 | 3.464357000  | -3.039485000 |
| F  | -3.674261000 | 3.226838000  | -0.866169000 |
| F  | -3.721125000 | 2.703942000  | 4.261649000  |
| F  | -4.020835000 | 1.886304000  | 2.248121000  |
| F  | -4.661473000 | -2.424051000 | -2.827943000 |
| F  | -5.138351000 | 2.319276000  | -2.223475000 |
| H  | 2.294653000  | -1.179266000 | -5.455604000 |
| H  | 4.525884000  | -0.029645000 | 2.705574000  |
| H  | -2.279393000 | 1.199666000  | 5.460066000  |
| H  | -4.528219000 | 0.023315000  | -2.714286000 |
| O  | 0.044995000  | -0.656809000 | 3.970783000  |
| O  | 1.394799000  | -0.924361000 | -2.254542000 |
| O  | 1.433399000  | 1.115276000  | 2.244926000  |
| O  | 1.700069000  | -1.554297000 | 1.815075000  |
| O  | -0.004000000 | -0.005506000 | 0.000777000  |
| O  | -0.042371000 | 0.662112000  | -3.967420000 |
| O  | -1.397436000 | 0.921717000  | 2.255961000  |
| O  | -1.434619000 | -1.119569000 | -2.255324000 |
| O  | -1.705906000 | 1.546281000  | -1.808916000 |
| Ti | 0.011999000  | -0.418059000 | 1.773813000  |
| Ti | -0.016273000 | 0.412752000  | -1.771034000 |

5 [Ti(acac)<sub>2</sub>(μ-O)]<sub>4</sub>

|   |              |              |              |
|---|--------------|--------------|--------------|
| C | 1.032401000  | 4.701779000  | 1.890329000  |
| C | 1.329853000  | 3.349983000  | 2.500817000  |
| C | 1.373765000  | 3.196078000  | 3.888818000  |
| C | 1.584740000  | 1.898643000  | 6.052037000  |
| C | 1.600638000  | 1.956549000  | 4.536247000  |
| C | 1.926889000  | -1.506797000 | -6.038622000 |
| C | 1.932020000  | -4.422381000 | -1.917802000 |
| C | 1.945886000  | -1.582596000 | -4.523756000 |
| C | 1.952000000  | -3.029843000 | -2.508844000 |
| C | 1.972156000  | -2.851253000 | -3.894437000 |
| C | 2.804149000  | 4.086192000  | -2.666254000 |
| C | 3.110651000  | 2.619656000  | -2.455247000 |
| C | 3.528080000  | -3.475751000 | 2.730725000  |
| C | 3.551304000  | -1.979197000 | 2.509157000  |
| C | 4.431979000  | 2.165139000  | -2.465197000 |
| C | 4.764736000  | -1.285691000 | 2.500265000  |
| C | 4.799389000  | 0.813019000  | -2.252926000 |
| C | 4.871793000  | 0.108548000  | 2.272362000  |
| C | 6.241110000  | 0.760701000  | 2.306245000  |
| C | 6.265406000  | 0.426485000  | -2.307492000 |
| C | -1.006238000 | -4.701007000 | 1.887692000  |
| C | -1.308514000 | -3.350926000 | 2.499869000  |

|   |              |              |              |
|---|--------------|--------------|--------------|
| C | -1.347266000 | -3.197261000 | 3.887986000  |
| C | -1.566814000 | -1.902514000 | 6.052020000  |
| C | -1.584596000 | -1.960156000 | 4.536344000  |
| C | -1.935425000 | 1.512372000  | -6.035628000 |
| C | -1.953199000 | 4.424919000  | -1.911882000 |
| C | -1.954584000 | 1.586654000  | -4.520691000 |
| C | -1.968385000 | 3.033018000  | -2.504661000 |
| C | -1.980452000 | 2.855030000  | -3.890446000 |
| C | -2.776761000 | -4.085764000 | -2.685838000 |
| C | -3.094484000 | -2.622594000 | -2.468132000 |
| C | -3.533697000 | 3.468796000  | 2.730114000  |
| C | -3.553977000 | 1.972036000  | 2.509512000  |
| C | -4.419023000 | -2.177292000 | -2.484762000 |
| C | -4.765991000 | 1.276220000  | 2.498567000  |
| C | -4.798498000 | -0.830078000 | -2.262198000 |
| C | -4.869604000 | -0.119284000 | 2.275999000  |
| C | -6.236962000 | -0.775369000 | 2.313587000  |
| C | -6.268208000 | -0.457096000 | -2.314128000 |
| H | 0.120235000  | 4.625434000  | 1.287908000  |
| H | 0.734372000  | 1.285866000  | 6.372798000  |
| H | 0.902690000  | 5.481671000  | 2.643360000  |
| H | 0.976380000  | -1.064957000 | -6.359046000 |
| H | 1.014796000  | -4.545338000 | -1.330981000 |
| H | 1.196431000  | 4.072198000  | 4.503648000  |
| H | 1.504397000  | 2.884656000  | 6.514644000  |
| H | 1.843928000  | 4.984208000  | 1.210662000  |
| H | 1.978087000  | -5.202029000 | -2.680809000 |
| H | 1.980686000  | -3.736314000 | -4.521852000 |
| H | 2.042197000  | -2.482923000 | -6.514540000 |
| H | 2.127754000  | 4.199494000  | -3.520421000 |
| H | 2.274886000  | 4.470468000  | -1.786928000 |
| H | 2.492751000  | 1.401285000  | 6.408578000  |
| H | 2.723753000  | -0.838332000 | -6.380876000 |
| H | 2.773972000  | -4.539541000 | -1.226556000 |
| H | 2.878492000  | -3.710461000 | 3.580756000  |
| H | 3.089485000  | -3.959602000 | 1.850394000  |
| H | 3.704040000  | 4.681099000  | -2.834086000 |
| H | 4.523619000  | -3.887269000 | 2.908590000  |
| H | 5.219630000  | 2.890792000  | -2.638477000 |
| H | 5.675832000  | -1.849346000 | 2.671877000  |
| H | 6.258873000  | 1.522057000  | 3.094398000  |
| H | 6.416846000  | 1.278076000  | 1.357253000  |
| H | 6.424165000  | -0.262456000 | -3.145359000 |
| H | 6.531420000  | -0.114098000 | -1.393519000 |
| H | 6.927002000  | 1.287018000  | -2.427137000 |
| H | 7.047344000  | 0.045643000  | 2.482812000  |
| H | -0.104110000 | -4.616212000 | 1.271718000  |
| H | -0.716991000 | -1.288399000 | 6.371912000  |
| H | -0.857586000 | -5.478536000 | 2.639653000  |
| H | -0.992238000 | 1.055085000  | -6.355767000 |
| H | -1.046810000 | 4.543184000  | -1.307638000 |
| H | -1.160516000 | -4.071520000 | 4.502749000  |
| H | -1.483870000 | -2.888586000 | 6.513980000  |
| H | -1.824771000 | -4.993411000 | 1.220635000  |
| H | -1.982081000 | 5.205844000  | -2.674389000 |
| H | -1.984883000 | 3.739941000  | -4.518076000 |
| H | -2.034923000 | 2.490882000  | -6.510184000 |
| H | -2.087996000 | -4.189402000 | -3.531277000 |
| H | -2.258205000 | -4.473593000 | -1.801732000 |

|    |              |              |              |
|----|--------------|--------------|--------------|
| H  | -2.475128000 | -1.406749000 | 6.409922000  |
| H  | -2.743233000 | 0.857567000  | -6.378880000 |
| H  | -2.807524000 | 4.545192000  | -1.236482000 |
| H  | -2.889215000 | 3.704834000  | 3.583738000  |
| H  | -3.091014000 | 3.952565000  | 1.851831000  |
| H  | -3.671037000 | -4.684261000 | -2.870201000 |
| H  | -4.530637000 | 3.879180000  | 2.902567000  |
| H  | -5.200073000 | -2.907634000 | -2.668317000 |
| H  | -5.678446000 | 1.839019000  | 2.665268000  |
| H  | -6.263778000 | -1.503413000 | 3.132529000  |
| H  | -6.396356000 | -1.332440000 | 1.384673000  |
| H  | -6.424070000 | 0.284158000  | -3.106121000 |
| H  | -6.553031000 | 0.018835000  | -1.369956000 |
| H  | -6.917876000 | -1.315593000 | -2.496772000 |
| H  | -7.048504000 | -0.057584000 | 2.450436000  |
| O  | 0.000490000  | 0.000153000  | 1.953354000  |
| O  | 1.521120000  | 2.403778000  | 1.648777000  |
| O  | 1.808252000  | 0.859879000  | 3.935464000  |
| O  | 1.923748000  | -0.475523000 | -3.906805000 |
| O  | 1.942211000  | -2.076912000 | -1.643704000 |
| O  | 2.038987000  | 0.173379000  | 0.018927000  |
| O  | 2.078414000  | 1.871846000  | -2.276584000 |
| O  | 2.395497000  | -1.439046000 | 2.338066000  |
| O  | 3.889678000  | 0.876651000  | 2.042626000  |
| O  | 3.979774000  | -0.125626000 | -2.021783000 |
| O  | -0.002844000 | 0.011641000  | -1.906708000 |
| O  | -1.513668000 | -2.406921000 | 1.648642000  |
| O  | -1.803026000 | -0.865252000 | 3.936467000  |
| O  | -1.936145000 | 0.478755000  | -3.904770000 |
| O  | -1.966833000 | 2.079308000  | -1.640013000 |
| O  | -2.040291000 | -0.176405000 | 0.021023000  |
| O  | -2.068982000 | -1.868705000 | -2.277437000 |
| O  | -2.396940000 | 1.434067000  | 2.342068000  |
| O  | -3.885691000 | -0.885149000 | 2.047209000  |
| O  | -3.987925000 | 0.113246000  | -2.018404000 |
| Ti | 1.770331000  | 0.404679000  | 1.803959000  |
| Ti | 1.811165000  | -0.062868000 | -1.771764000 |
| Ti | -1.768522000 | -0.407970000 | 1.805479000  |
| Ti | -1.816389000 | 0.067218000  | -1.769510000 |

6 [Ti(hfaa)<sub>2</sub>(μ-O)]<sub>4</sub>

|   |             |              |              |
|---|-------------|--------------|--------------|
| C | 1.661087000 | 4.761170000  | 1.943895000  |
| C | 1.710018000 | 3.335528000  | 2.579783000  |
| C | 1.782601000 | 3.201159000  | 3.961383000  |
| C | 1.808155000 | 1.922187000  | 4.559271000  |
| C | 1.815358000 | 1.809400000  | 6.124752000  |
| C | 2.111549000 | -1.407628000 | -6.164346000 |
| C | 2.146756000 | -1.509394000 | -4.597223000 |
| C | 2.335964000 | -2.928591000 | -2.627801000 |
| C | 2.376469000 | -2.773043000 | -4.007252000 |
| C | 2.533637000 | 4.099576000  | -3.181489000 |
| C | 2.579346000 | -4.338603000 | -2.002990000 |
| C | 2.981639000 | 2.657641000  | -2.780513000 |
| C | 3.323793000 | -3.525140000 | 3.112416000  |
| C | 3.467442000 | -2.015724000 | 2.739579000  |
| C | 4.321298000 | 2.298750000  | -2.879785000 |
| C | 4.703292000 | -1.392402000 | 2.847192000  |
| C | 4.746959000 | 1.005655000  | -2.506253000 |

|   |              |              |              |
|---|--------------|--------------|--------------|
| C | 4.855039000  | -0.028792000 | 2.504120000  |
| C | 6.274665000  | 0.619312000  | 2.689762000  |
| C | 6.275213000  | 0.653953000  | -2.572121000 |
| C | -1.669505000 | -4.761377000 | 1.936282000  |
| C | -1.727542000 | -3.338149000 | 2.574457000  |
| C | -1.835044000 | -3.206849000 | 3.952019000  |
| C | -1.857398000 | -1.928183000 | 4.556209000  |
| C | -1.901111000 | -1.862581000 | 6.125724000  |
| C | -2.138268000 | 1.409112000  | -6.173675000 |
| C | -2.156956000 | 1.499900000  | -4.604782000 |
| C | -2.334838000 | 2.928602000  | -2.640457000 |
| C | -2.385436000 | 2.766561000  | -4.017741000 |
| C | -2.519007000 | -4.099568000 | -3.164894000 |
| C | -2.569988000 | 4.340842000  | -2.018503000 |
| C | -2.969539000 | -2.657712000 | -2.766449000 |
| C | -3.270453000 | 3.541222000  | 3.114576000  |
| C | -3.428235000 | 2.033696000  | 2.738302000  |
| C | -4.310026000 | -2.301775000 | -2.864677000 |
| C | -4.670543000 | 1.422360000  | 2.846737000  |
| C | -4.737612000 | -1.007021000 | -2.497651000 |
| C | -4.834492000 | 0.059230000  | 2.510002000  |
| C | -6.257821000 | -0.576737000 | 2.705620000  |
| C | -6.269433000 | -0.667740000 | -2.552773000 |
| F | 0.583325000  | 4.879890000  | 1.130418000  |
| F | 0.654807000  | 1.242843000  | 6.550632000  |
| F | 0.818296000  | -1.394505000 | -6.591855000 |
| F | 1.562482000  | -4.673071000 | -1.171762000 |
| F | 1.589370000  | 5.747348000  | 2.874498000  |
| F | 1.684856000  | 4.044817000  | -4.243639000 |
| F | 1.878073000  | 4.695727000  | -2.153797000 |
| F | 1.939870000  | 3.011915000  | 6.743673000  |
| F | 2.492557000  | -3.666126000 | 4.180582000  |
| F | 2.686241000  | -5.314599000 | -2.941110000 |
| F | 2.703982000  | -0.267021000 | -6.590358000 |
| F | 2.736517000  | -2.452085000 | -6.768218000 |
| F | 2.777674000  | 4.977076000  | 1.197048000  |
| F | 2.790723000  | -4.220681000 | 2.076117000  |
| F | 2.840815000  | 1.021611000  | 6.538668000  |
| F | 3.576586000  | 4.896509000  | -3.526186000 |
| F | 3.731114000  | -4.333734000 | -1.278242000 |
| F | 4.509928000  | -4.101783000 | 3.431833000  |
| F | 6.403303000  | 1.749884000  | 1.964277000  |
| F | 6.459493000  | 0.938524000  | 4.003847000  |
| F | 6.465698000  | -0.502999000 | -3.255677000 |
| F | 6.762640000  | 0.480390000  | -1.312938000 |
| F | 7.016921000  | 1.618555000  | -3.173559000 |
| F | 7.272375000  | -0.230243000 | 2.326125000  |
| F | -0.570353000 | -4.885416000 | 1.152139000  |
| F | -0.643110000 | -2.008889000 | 6.629291000  |
| F | -0.883337000 | 1.680945000  | -6.632117000 |
| F | -1.526875000 | 4.688289000  | -1.225408000 |
| F | -1.628812000 | -5.749776000 | 2.866384000  |
| F | -1.718008000 | -4.048911000 | -4.264209000 |
| F | -1.810003000 | -4.671645000 | -2.159707000 |
| F | -2.390957000 | -0.680713000 | 6.557803000  |
| F | -2.454649000 | 3.669212000  | 4.196640000  |
| F | -2.481720000 | 0.174828000  | -6.601387000 |
| F | -2.674804000 | -2.852537000 | 6.648256000  |
| F | -2.712167000 | 4.232491000  | 2.089156000  |

|    |              |              |              |
|----|--------------|--------------|--------------|
| F  | -2.716340000 | 5.309426000  | -2.959111000 |
| F  | -2.766067000 | -4.969859000 | 1.158019000  |
| F  | -2.989853000 | 2.302957000  | -6.744294000 |
| F  | -3.564286000 | -4.916471000 | -3.451609000 |
| F  | -3.695609000 | 4.332847000  | -1.254293000 |
| F  | -4.453664000 | 4.133530000  | 3.416986000  |
| F  | -6.402546000 | -1.705380000 | 1.980316000  |
| F  | -6.434980000 | -0.896896000 | 4.020877000  |
| F  | -6.469684000 | 0.557072000  | -3.097806000 |
| F  | -6.779732000 | -0.651070000 | -1.289650000 |
| F  | -6.983668000 | -1.567100000 | -3.276491000 |
| F  | -7.251188000 | 0.282083000  | 2.351344000  |
| H  | 1.802784000  | 4.085467000  | 4.582689000  |
| H  | 2.570849000  | -3.631676000 | -4.634697000 |
| H  | 5.043530000  | 3.021466000  | -3.232222000 |
| H  | 5.560423000  | -1.957302000 | 3.188100000  |
| H  | -1.883200000 | -4.092598000 | 4.571080000  |
| H  | -2.586865000 | 3.621299000  | -4.649096000 |
| H  | -5.032188000 | -3.027594000 | -3.211278000 |
| H  | -5.522171000 | 1.995974000  | 3.186938000  |
| O  | 0.004361000  | 0.004027000  | -1.922771000 |
| O  | 0.007584000  | -0.006201000 | 1.907467000  |
| O  | 1.675312000  | 2.396322000  | 1.710145000  |
| O  | 1.805016000  | 0.816889000  | 3.962397000  |
| O  | 1.925415000  | -0.431957000 | -3.992896000 |
| O  | 2.011204000  | 1.924047000  | -2.383254000 |
| O  | 2.046563000  | 0.197232000  | -0.009733000 |
| O  | 2.116991000  | -2.020282000 | -1.750948000 |
| O  | 2.364624000  | -1.487399000 | 2.356173000  |
| O  | 3.956112000  | 0.742383000  | 2.090784000  |
| O  | 4.019948000  | 0.068789000  | -2.089887000 |
| O  | -1.668521000 | -2.394721000 | 1.708374000  |
| O  | -1.809250000 | -0.822539000 | 3.966576000  |
| O  | -1.925655000 | 0.427150000  | -3.998453000 |
| O  | -1.998886000 | -1.919246000 | -2.378597000 |
| O  | -2.036004000 | -0.192042000 | -0.009026000 |
| O  | -2.108459000 | 2.023268000  | -1.760819000 |
| O  | -2.330923000 | 1.494132000  | 2.356985000  |
| O  | -3.943583000 | -0.722005000 | 2.096799000  |
| O  | -4.011926000 | -0.067265000 | -2.086293000 |
| Ti | 1.787055000  | 0.369728000  | 1.789230000  |
| Ti | 1.825243000  | -0.015728000 | -1.808341000 |
| Ti | -1.773946000 | -0.372879000 | 1.787019000  |
| Ti | -1.815864000 | 0.022265000  | -1.807997000 |

<sup>1</sup> Apex2 (Version 1.0-27), Bruker AXS Inc., Madison, Wisconsin, USA, 2005.

<sup>2</sup> COSMO (Version 1.48), Bruker AXS Inc., Madison, Wisconsin, USA, 2003.

<sup>3</sup> SAINT-Plus (Version 7.12, including XPREP), Bruker AXS Inc., Madison, Wisconsin, USA, 2004.

<sup>4</sup> SADABS (Version 2004/1), Bruker AXS Inc., Madison, Wisconsin, USA, 1998.

<sup>5</sup> A. Altomare, M.C. Burla, M. Camalli, G.L. Cascarano, C. Giacovazzo, A. Guagliardi, A.G.G. Moliterni, G. Polidori and R. Spagna, *J. Appl. Cryst.*, 1999, **32**, 115–119.

<sup>6</sup> L.J. Farrugia, WinGX (Version 1.70.01), *J. Appl. Cryst.*, 1999, **32**, 837–838.

<sup>7</sup> G.M. Sheldrick, *SHELXL97 Program for crystal structure refinement*, University of Göttingen, Göttingen, Germany, 1997.

<sup>8</sup> *International Tables for Crystallography*, Kluwer Academic Publishers, Dordrecht, The Netherlands, 2001, Vol. C.

<sup>9</sup> K. Brandenburg and H Putz, *DIAMOND* (Release 3.1a), Crystal Impact GbR, Bonn, Germany, 2005.

- 
- (10) G. te Velde, F.M Bickelhaupt, E.J. Baerends, C. Fonseca Guerra, S.J.A. van Gisbergen, J.G. Snijders, T. Ziegler, J. Comput. Chem. 22 (2001) 931-967.
- (11) A. Klamt, G. Schüürmann, *J. Chem. Soc., Perkin Trans. 2* (1993) 799-805.
- (12) A. Klamt, *J. Phys. Chem.* 99 (1995) 2224-2235.
- (13) A. Klamt, V. Jones, *J. Chem. Phys.* 105 (1996) 9972-9981.
- (14) C.C. Pye, T. Ziegler, *Theor. Chem. Acc.* 101 (1999) 396-408.
- (15) J.L. Pascual-Ahuir, E. Silla, I. Tuñon, *J. Comput. Chem.* 15 (1994) 1127-1138.
